# Supplementary material for: First Molecular Data of Gongylonema pulchrum (Rhabditida: Gongylonematidae) in European Fallow Deer Dama dama from Romania
Source: MDPI journal article supplement (doi:10.3390/pathogens13020175), 2024-02-15

Supplementary file S1

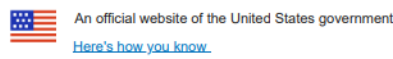

Nucleotide

GenBank

Gongylonema pulchrum isolate RO\_465 internal transcribed spacer 1, partial sequence; 5.8S ribosomal RNA gene, complete sequence; and internal transcribed spacer 2, partial sequence

GenBank: PP229209.1

[FASTA](#) [Graphics](#)

[Go to:](#)

LOCUS PP229209 485 bp DNA linear INV 03-FEB-2024  
DEFINITION Gongylonema pulchrum isolate RO\_465 internal transcribed spacer 1, partial sequence; 5.8S ribosomal RNA gene, complete sequence; and internal transcribed spacer 2, partial sequence.  
ACCESSION PP229209  
VERSION PP229209.1  
KEYWORDS .  
SOURCE Gongylonema pulchrum  
ORGANISM [Gongylonema pulchrum](#)  
Eukaryota; Metazoa; Ecdysozoa; Nematoda; Chromadorea; Rhabditida; Spirurina; Spiruromorpha; Spiruroidea; Gongylonematidae; Gongylonema.  
REFERENCE 1 (bases 1 to 485)  
AUTHORS Imre,M., Popovici,D.C., Marin,A.-M., Ionescu,O., Moraru,M.M.F., Kaya,D.A. and Mederle,N.  
TITLE Molecular Characterization of Gongylonema pulchrum (Molin 1857) in Fallow Deer in Romania - First Report  
JOURNAL Unpublished  
REFERENCE 2 (bases 1 to 485)  
AUTHORS Imre,M., Popovici,D.C., Marin,A.-M., Ionescu,O., Moraru,M.M.F., Kaya,D.A. and Mederle,N.  
TITLE Direct Submission  
JOURNAL Submitted (27-JAN-2024) Parasitology and Parasitic Disease Department, University of Life Sciences Timisoara, Timisoara, Calea Aradului No. 119, Timisoara, Timis 300645, Romania  
COMMENT ##Assembly-Data-START##  
Sequencing Technology :: Sanger dideoxy sequencing  
##Assembly-Data-END##  
FEATURES  
source  
1..485  
/organism="Gongylonema pulchrum"  
/mol\_type="genomic DNA"  
/isolate="RO\_465"  
/isolation\_source="esophagus"  
/host="Dama dama"  
/db\_xref="taxon:637853"  
/country="Romania"  
/collection\_date="01-Sep-2022"  
[misc\\_RNA](#)  
<1..>485  
/note="contains internal transcribed spacer 1, 5.8S ribosomal RNA, and internal transcribed spacer 2"  
ORIGIN  
1 cccccacaaa aaaaaaaaaa cccccccac acacacacac acattattgt attttggttaa  
61 aaatatactg ataaaaatat cagttataaa gagatttact ctagcggtg gatcacttgg  
121 ctctgtggatc gatgaagaac gcagctagct gcgataaata gtgcgaattg cagacacatt  
181 gagcactaaa atttcaaacg cacattgcgc catcgggttc attcccgttg gcatgtcttg  
241 ctgagggttta attcaaacaa aaagaatcta tctcagattg aatatgaaaa accatcgtca  
301 ggtaattgtga tggttgtact gctgctgcgg ctgctatatt tccctgatca gtttttgcta  
361 ttataattgt gtacggggca acaacaattc aaatagcaac tattaatttc tactactaca  
421 acaagaaag aaaatttaca tgtatgtagt agagaaaga atgtggtgcg cattattaat  
481 tttta  
//

## Supplementary file S2

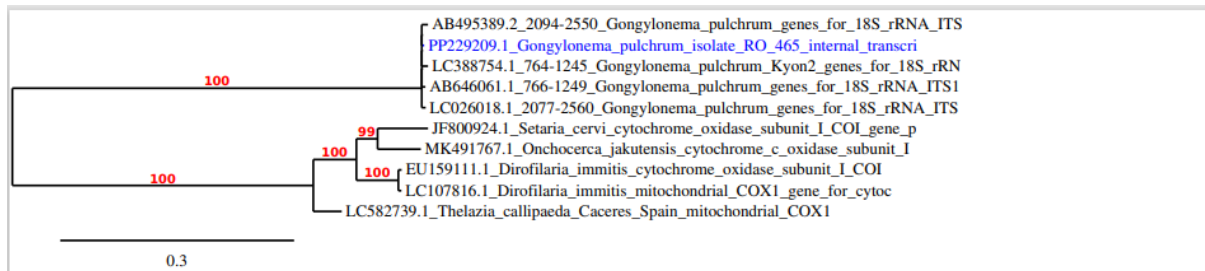

Supplement: s1 [file s1]
